# Supplementary material for: The Relationship Between Alcohol and Glycohemoglobin: A Biopsychosocial Perspective
Source: PubMed Central journal article supplement (PMC6776959; doi:10.1089/biores.2019.0009), 2019-10-03

## Supplementary Data

Derivation of the Final Analytic Sample; NHANES 2013-2014 (n=4,299)

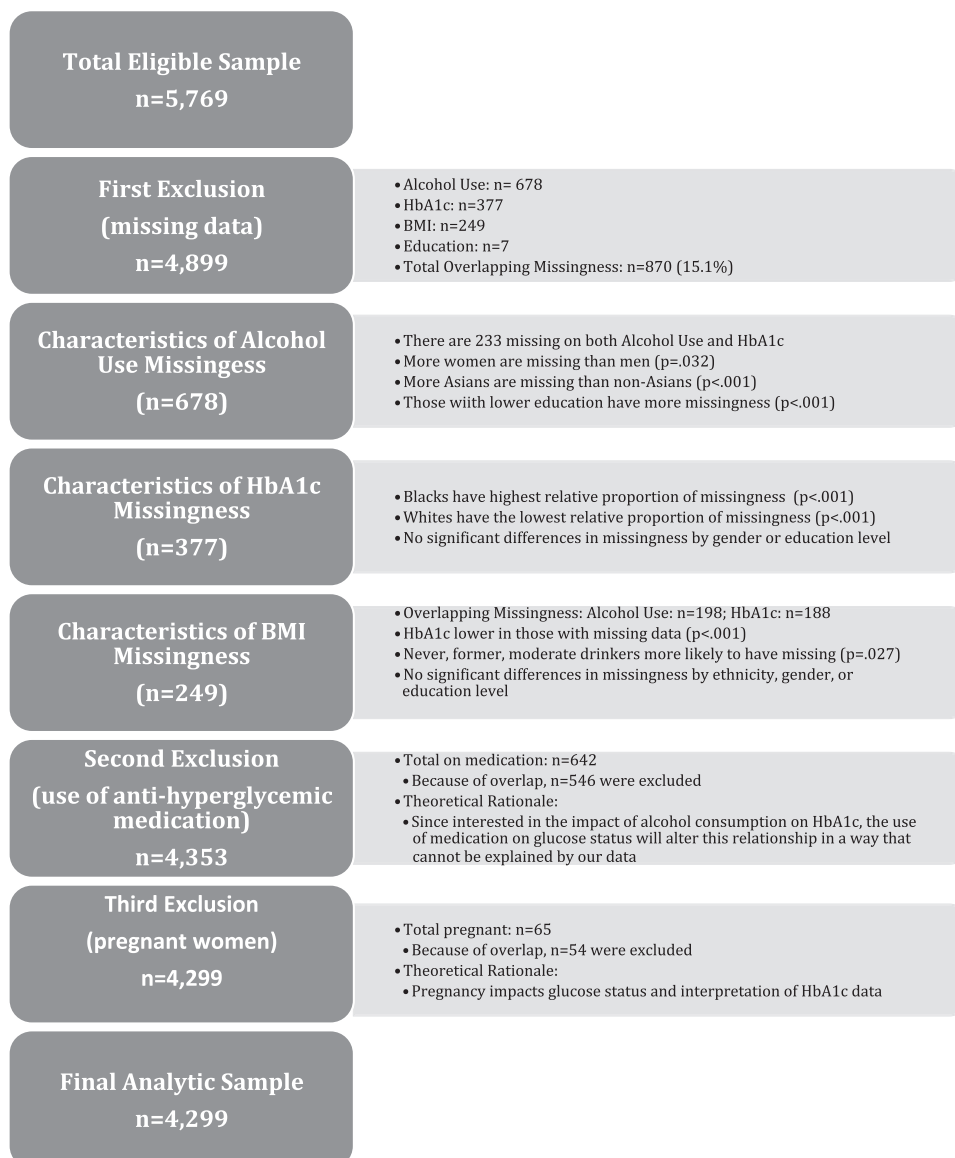

**SUPPLEMENTARY FIG. S1.** Derivation of the final analytic sample; National Health and Nutrition Examination Survey 2013–2014 (n = 4299). BMI, body mass index; HbA1c, glycohemoglobin.

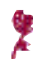

Supplement: Supp_FigS1.pdf [file Supp_FigS1.pdf]
